# Supplementary material for: Arterial Spin Labeling Magnetic Resonance Imaging for Acute Disorders of Consciousness in the Intensive Care Unit
Source: PubMed Central journal article supplement (PMC11599417; doi:10.1007/s12028-024-02031-0), 2024-06-25

**Supplemental file: Grønlund et al. Arterial spin labeling MRI for acute disorders of consciousness in the ICU**

**Figure S1:** Box and whisker plot showing CBF levels of the best (“max hemi”) and worst (“min hemi”) hemispheres all DoC patients measured at 1.5T ALS-MRI.

**Figure S2:** Best hemispheric CBF of  $\leq$ UWS and  $\geq$ MCS patients and of healthy controls (right hemisphere) as a function of hemoglobin levels. All groups showed decreasing CBF with increasing hemoglobin levels.

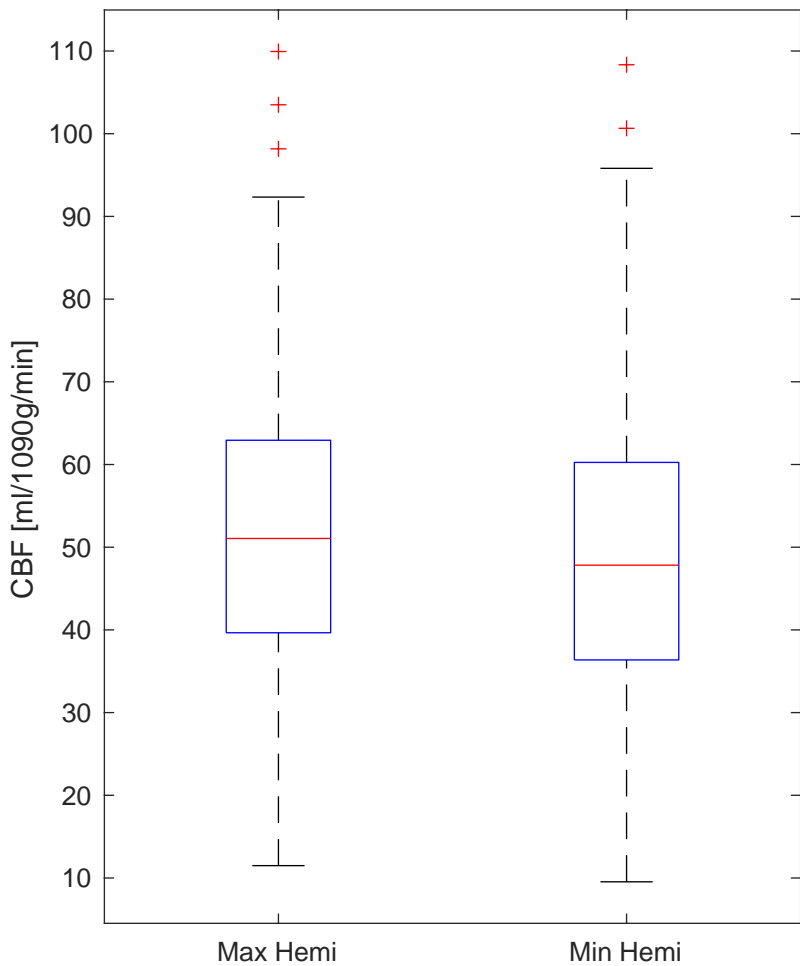

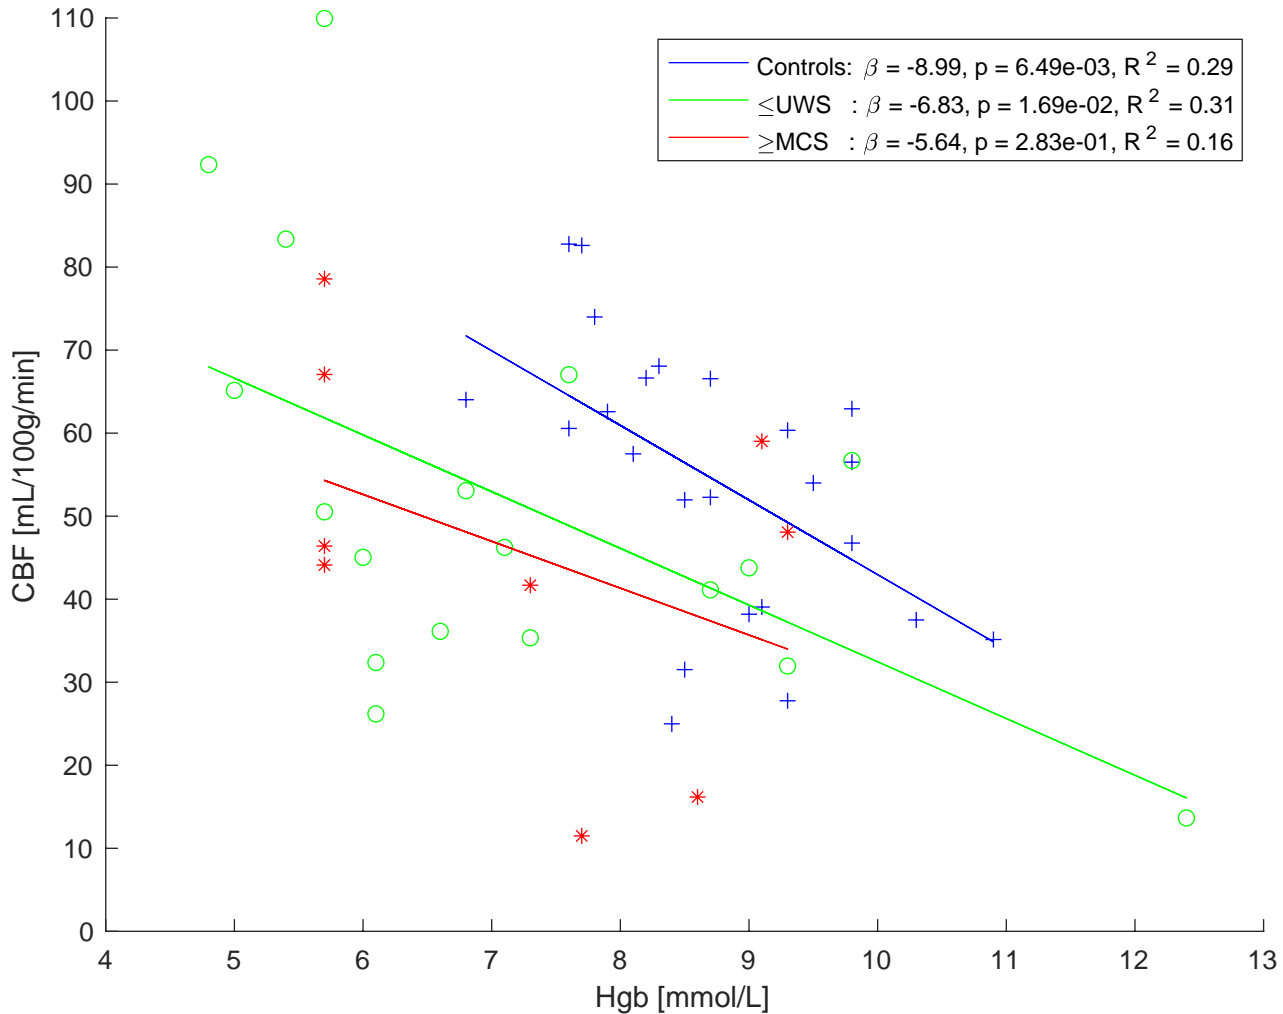

Supplement: 12028_2024_2031_MOESM1_ESM.pdf [file 12028_2024_2031_MOESM1_ESM.pdf]
